# Supplementary material for: Efficacy and Tolerability of Vardenafil in Men With Mild Depression and Erectile Dysfunction: The Depression-Related Improvement With Vardenafil for Erectile Response Study
Source: Atypon-hosted journal article supplement (doi:10.1176/appi.ajp.163.1.79), 2006-01-01
Supplement: ajp_163_1_79_01.pdf [file ajp_163_1_79_01.pdf]

## **Acknowledgment**

The Vardenafil Study Site Investigators are the following:

### **Canada**

Pierre Alarie, Montreal; Pierre Assalian, Montreal General Hospital, Montreal; David Bakish, Smyth Medical Centre, Ottawa; Mark Berber, Markham Stouffville Health Centre, Markham, Ont.; Pierre Chue, Edmonton, Alta.; Ben Lasko, MANNA Research, Toronto; Pierre Matte, Q et T Recherche, Sherbrooke, Que.; Richard Payeur, Centre Hôpital Pierre-Janet, Hull, Que.; Ronald Stevenson, Vancouver Hospital and Health Sciences Centre, Vancouver, B.C.; and Richard Tytus, Hamilton, Ont.

### **France**

Mireille Bonierbale, Hopitaux Sud-Hopital Sainte Marguerite, Marseille; Jacques Buvat, CETARP, Lille; Olivier Cambau, Cabinet Médical-Gambetta, Lyon; Daniel Chevallier, Hôpital Pasteur, Nice; Marie-Hélène Colson, Cabinet Médical-Puget, Marseille; Béatrice Cuzin, Hôpital Edouard Herriot, Lyon; Gérard Leibovici, Cabinet Médical-Sérane, Marseille; Sylvain Mimoun, Cabinet Médical-45 Maubeuge, Paris; Robert Porto, Cabinet Médical-Rodocanachi, Marseille; and Francois Xavier Poudat, Nantes.

### **Italy**

Edoardo Austoni, Ospedale S. Giuseppe, Milan; Vincenzo Gentile, Università degli Studi “La Sapienza,” Rome; Franco Mantero, Azienda

Ospedaliera di Padova, Padova; Vincenzo Mirone, Policlinico Federico II, Naples; Francesco Montorsi, Istituto Scientifico H.S. Raffaele, Milan; Francesco Paolo Selvaggi, Policlinico, Bari; Edoardo Pescatori, Ospedale Hesperia, Modena; Enrico Pisani, Policlinico, Milan; and Michelangelo Rizzo, Azienda Ospedaliera Policlinico Careggi, Florence.

## **Spain**

Natalio Cruz, Hospital Virgen del Rocío, Seville; Ignacio Moncada, Hospital Gregorio Marañón, Madrid; Gutiérrez del Pozo, Hospital Clínic i Provincial de Barcelona, Barcelona; and Luís Rodríguez Vela, Hospital Miguel Servet, Zaragoza.

## **United States of America**

Anita Clayton, University of Virginia Center for Psychiatric Clinical Research, Charlottesville, Va.; Craig Donatucci, Duke University Medical Center, Durham, N.C.; Irwin Goldstein, Institute of Sexual Medicine, Boston, Mass.; James McMurray, AmDocs–Medical Affiliated Research Center, Inc., Huntsville, Ala.; William Moseley, AmDocS–San Diego Urology Research, San Diego; H. George Nurnberg, University of New Mexico School of Medicine, Albuquerque, N.Mex.; Harin Padma-Nathan, AmDocS–The Male Clinic, Beverly Hills, Calif.; E. Lee/P.K. Randall, Irvine Center for Clinical Research, Irvine, Calif.; Robert Riesenber, Atlanta; Raymond Rosen, UMDNJ–Robert Wood Johnson Medical School, New Brunswick, N.J.; Ridwan Shabsigh, Columbia University, New York; and Kevin Tomera, Alaska Clinical Research Center, Anchorage, Alaska.
